# Supplementary material for: Localized protein biotinylation at DNA damage sites identifies ZPET, a repressor of homologous recombination
Source: PubMed Central journal article supplement — Genes Dev. 2019 Jan 1;33(1-2):75–89. doi: 10.1101/gad.315978.118 (PMC6317314; doi:10.1101/gad.315978.118), 2019-01-01
Supplement: supp_gad.315978.118_Supplemental_Table1_and_2.pdf [file supp_gad.315978.118_Supplemental_Table1_and_2.pdf]

Supplemental table 1

| Reference             | Entry  | Gene_name   | # peptides | average ratio<br>BirA*Rad18 (Biotin +<br>IR) over BirA*GFP<br>(Biotin + IR) | average +IR/<br>IR for<br>BirA*Rad18 | p-value    | z-score from<br>p-value | Ranked by +IR/-<br>IR                                     | known<br>properties                                         | references                                                                                        |
|-----------------------|--------|-------------|------------|-----------------------------------------------------------------------------|--------------------------------------|------------|-------------------------|-----------------------------------------------------------|-------------------------------------------------------------|---------------------------------------------------------------------------------------------------|
| splP05090 APOD_HUMAN  | P05090 | APOD_HUMAN  | 2          | 3.614306649                                                                 | 2.80730729                           | 0.34212458 | 2.11445083              | Apolipoprotein D                                          |                                                             |                                                                                                   |
| splQ14676 MDC1_HUMAN  | Q14676 | MDC1_HUMAN  | 18         | 2.343450223                                                                 | 2.59422339                           | 0.00478479 | 13.9346784              | Mediator of DNA<br>damage checkpoint<br>protein 1         |                                                             |                                                                                                   |
| splQ8NCN4 RN169_HUMAN | Q8NCN4 | RN169_HUMAN | 3          | 4.209486458                                                                 | 2.52264283                           | 0.15389746 | 4.32607435              | E3 ubiquitin-protein<br>ligase RNF169                     |                                                             |                                                                                                   |
| splO00469 PLOD2_HUMAN | O00469 | PLOD2_HUMAN | 2          | 2.273552105                                                                 | 2.0637377                            | 0.13712442 | 4.64553899              | Procollagen-lysine,2-<br>oxoglutarate 5-<br>dioxygenase 2 |                                                             |                                                                                                   |
| splQ96RL1 UIMC1_HUMAN | Q96RL1 | UIMC1_HUMAN | 4          | 4.124663651                                                                 | 2.00170986                           | 0.13985809 | 4.59089242              | BRCA1-A complex<br>subunit RAP80                          |                                                             |                                                                                                   |
| splQ8ND82 Z280C_HUMAN | Q8ND82 | Z280C_HUMAN | 4          | 2.884018089                                                                 | 1.83803559                           | 0.10228989 | 5.45688885              | Zinc finger protein<br>280C                               |                                                             |                                                                                                   |
| splQ12888 TP53B_HUMAN | Q12888 | TP53B_HUMAN | 9          | 2.460705668                                                                 | 1.47525806                           | 0.27813614 | 2.68768254              | Tumor suppressor<br>p53-binding protein 1                 |                                                             |                                                                                                   |
| splO76064 RNFB_HUMAN  | O76064 | RNFB_HUMAN  | 3          | 3.525593049                                                                 | 1.43792037                           | 0.21736264 | 3.37020797              | E3 ubiquitin-protein<br>ligase RNF8                       |                                                             |                                                                                                   |
| splQ9Y253 POLH_HUMAN  | Q9Y253 | POLH_HUMAN  | 4          | 2.981581688                                                                 | 1.43776166                           | 0.2735299  | 2.73391379              | DNA polymerase eta                                        |                                                             |                                                                                                   |
| splQ92547 TOPB1_HUMAN | Q92547 | TOPB1_HUMAN | 2          | 1.799041616                                                                 | 1.43481979                           | 0.18412957 | 3.82955742              | DNA topoisomerase 2-<br>binding protein 1                 |                                                             |                                                                                                   |
| splQ6IQ32 ADNP2_HUMAN | Q6IQ32 | ADNP2_HUMAN | 3          | 1.531802691                                                                 | 1.4313704                            | 0.25458588 | 2.93260766              | ADNP homeobox<br>protein 2                                | loss of ADNP2<br>sensitizes cells<br>to oxidative<br>damage | Kushnir et al. 2008                                                                               |
| splQ14865 ARI5B_HUMAN | Q14865 | ARI5B_HUMAN | 7          | 2.028032118                                                                 | 1.41108765                           | 0.12088891 | 5.45688885              | AT-rich interactive<br>domain-containing<br>protein 5B    | recruited to<br>laser stripes                               | Leung et al. 2017                                                                                 |
| splQ7Z3K3 POGZ_HUMAN  | Q7Z3K3 | POGZ_HUMAN  | 4          | 2.200100193                                                                 | 1.40345814                           | 0.04368266 | 7.81238853              | Pogo transposable<br>element with ZNF<br>domain           | regulates RPA<br>recruitment                                | Baude et al. 2016                                                                                 |
| splQ96JM2 ZN462_HUMAN | Q96JM2 | ZN462_HUMAN | 2          | 1.977431057                                                                 | 1.36364133                           | 0.14902904 | 4.41506485              | Zinc finger protein<br>462                                | a possible<br>ATM/ATR<br>substrate                          | Matsuoka et al. 2007                                                                              |
| splP38398 BRCA1_HUMAN | P38398 | BRCA1_HUMAN | 5          | 3.767225405                                                                 | 1.34237                              | 0.3535389  | 2.02359671              | Breast cancer type 1<br>susceptibility protein            |                                                             |                                                                                                   |
| splP00387 NB5R3_HUMAN | P00387 | NB5R3_HUMAN | 3          | 1.377093544                                                                 | 1.30749984                           | 0.18199308 | 3.86186729              | NADH-cytochrome b5<br>reductase 3                         |                                                             |                                                                                                   |
| splQ96JM3 CHAP1_HUMAN | Q96JM3 | CHAP1_HUMAN | 9          | 1.790946216                                                                 | 1.26485029                           | 0.16834868 | 4.07761049              | Chromosome<br>alignment-maintaining<br>phosphoprotein 1   | Interacts with<br>MDC1, Rev7                                | <a href="https://thebiogrid.org/interaction/809571">https://thebiogrid.org/interaction/809571</a> |
| splP53634 CATC_HUMAN  | P53634 | CATC_HUMAN  | 2          | 1.493040003                                                                 | 1.2359247                            | 0.36276237 | 1.95229862              | Dipeptidyl peptidase<br>1                                 |                                                             |                                                                                                   |
| splQ5TGY3 AHDC1_HUMAN | Q5TGY3 | AHDC1_HUMAN | 3          | 1.661335963                                                                 | 1.18417252                           | 0.20662094 | 3.51051255              | AT-hook DNA-binding<br>motif-containing<br>protein 1      | PARylated<br>after damage                                   | Zhen and Yu<br>2018                                                                               |
| splQ9H582 ZN644_HUMAN | Q9H582 | ZN644_HUMAN | 2          | 1.370318072                                                                 | 1.16824298                           | 0.17367926 | 3.99131214              | Zinc finger protein<br>644                                |                                                             | Dungrawala et al.<br>2015                                                                         |
| sp P10244 MYBB_HUMAN  | P10244 | MYBB_HUMAN  | 7          | 1.325345254                                                                 | 1.15757628                           | 0.37618351 | 1.85172606              | Myb-related protein B                                     |                                                             |                                                                                                   |
| splQ2NL82 TSR1_HUMAN  | Q2NL82 | TSR1_HUMAN  | 2          | 1.705754251                                                                 | 1.15661838                           | 0.33220811 | 2.19587801              | Pre-rRNA-processing<br>protein TSR1<br>homolog            |                                                             |                                                                                                   |
| splQ14839 CHD4_HUMAN  | Q14839 | CHD4_HUMAN  | 11         | 2.249456748                                                                 | 1.10753189                           | 0.13931482 | 4.60166696              | Chromodomain-<br>helicase-DNA-binding<br>protein 4        |                                                             | Pan et al. 2012                                                                                   |

| Reference             | Entry  | Gene_name   | # peptides | average ratio<br>BirA*Rad18 (Biotin +<br>IR) over BirA*GFP<br>(Biotin + IR) | average +IR/<br>IR for<br>BirA*Rad18 |
|-----------------------|--------|-------------|------------|-----------------------------------------------------------------------------|--------------------------------------|
| splQ9NS91 RAD18_HUMAN | Q9NS91 | RAD18_HUMAN | 148        | 74.53554124                                                                 | 1.04482982                           |

## Supplemental table 1

**Supplemental table 1. Multiplexed mass spectrometry reveals that BirA<sup>R118G</sup>-Rad18 preferentially biotinylates DDR proteins following irradiation.** The biotinylation assay was carried out as described in the methods section followed by MS (technical duplicate). Biotinylated proteins with less than two peptides were excluded. The dataset for BirA<sup>R118G</sup>-RAD18 was normalized to the dataset of BirA<sup>R118G</sup>-GFP. The ratio of BirA<sup>R118G</sup>-RAD18 (Biotin + IR) over BirA<sup>R118G</sup>-GFP (Biotin + IR) was calculated and only the biotinylated proteins with a ratio of  $\geq 1.3$  were considered. Proteins were then ranked based on descending order of the ratio of BirA<sup>R118G</sup>-RAD18 (Biotin + IR) over BirA<sup>R118G</sup>-RAD18 (Biotin - IR). The p-values were determined for each protein followed by a z-score analysis. Only proteins with a z-score  $\geq 2$  were considered. Proteins highlighted in red, yellow and blue are known DDR proteins, proteins indirectly linked to DDR, or an uncharacterized protein, respectively.

## Supplemental table 1

### References

Baude A, Aaes TL, Zhai B, Al-Nakouzi N, Oo HZ, Daugaard M, Rohde M, Jaattela M. 2016. Hepatoma-derived growth factor-related protein 2 promotes DNA repair by homologous recombination. *Nucleic Acids Res* **44**: 2214-2226.

Dungrawala H, Rose KL, Bhat KP, Mohni KN, Glick GG, Couch FB, Cortez D. 2015. The Replication Checkpoint Prevents Two Types of Fork Collapse without Regulating Replisome Stability. *Mol Cell* **59**: 998-1010.

Kushnir M, Dresner E, Mandel S, Gozes I. 2008. Silencing of the ADNP-family member, ADNP2, results in changes in cellular viability under oxidative stress. *J Neurochem* **105**: 537-545.

Leung JW, Makharashvili N, Agarwal P, Chiu LY, Pourpre R, Cammarata MB, Cannon JR, Sherker A, Durocher D, Brodbelt JS et al. 2017. ZMYM3 regulates BRCA1 localization at damaged chromatin to promote DNA repair. *Genes Dev* **31**: 260-274.

Matsuoka S, Ballif BA, Smogorzewska A, McDonald ER, 3rd, Hurov KE, Luo J, Bakalarski CE, Zhao Z, Solimini N, Lerenthal Y et al. 2007. ATM and ATR substrate analysis reveals extensive protein networks responsive to DNA damage. *Science* **316**: 1160-1166.

Pan MR, Hsieh HJ, Dai H, Hung WC, Li K, Peng G, Lin SY. 2012. Chromodomain helicase DNA-binding protein 4 (CHD4) regulates homologous recombination DNA repair, and its deficiency sensitizes cells to poly(ADP-ribose) polymerase (PARP) inhibitor treatment. *J Biol Chem* **287**: 6764-6772.

Zhen Y, Yu Y. 2018. Proteomic Analysis of the Downstream Signaling Network of PARP1. *Biochemistry* **57**: 429-440.

## Supplemental table 2

| Entry     | Protein_name                                                                                  | # peptides | Average ratio (BirA*GFP Biotin + IR)/(BirA*Rad18 Biotin + IR) <b>ratio above 1.3</b> | P value     |
|-----------|-----------------------------------------------------------------------------------------------|------------|--------------------------------------------------------------------------------------|-------------|
| P22670    | MHC class II regulatory factor RFX1                                                           | 2          | 1.430833674                                                                          | 0.073724535 |
| Q8IVM0    | Coiled-coil domain-containing protein 50                                                      | 5          | 1.773655911                                                                          | 0.080727133 |
| Q8IU81    | Interferon regulatory factor 2-binding protein 1                                              | 2          | 1.632965357                                                                          | 0.088136168 |
| P50479    | PDZ and LIM domain protein 4                                                                  | 9          | 1.930271679                                                                          | 0.102811944 |
| Q8IZ21    | Phosphatase and actin regulator 4                                                             | 2          | 2.126480984                                                                          | 0.10322152  |
| Q16630    | Cleavage and polyadenylation specificity factor subunit 6                                     | 3          | 1.351906761                                                                          | 0.115516788 |
| Q9ULU4-11 | Isoform 11 of Protein kinase C-binding protein 1                                              | 8          | 1.550534173                                                                          | 0.144797445 |
| Q96KR1    | Zinc finger RNA-binding protein                                                               | 14         | 2.382830666                                                                          | 0.152050352 |
| Q96PV6    | Leukocyte receptor cluster member 8                                                           | 5          | 1.661165384                                                                          | 0.161373721 |
| Q15942    | Zyxin                                                                                         | 11         | 3.686219925                                                                          | 0.187217857 |
| Q15637-5  | Isoform 5 of Splicing factor 1                                                                | 9          | 1.736531068                                                                          | 0.187379903 |
| P05412    | Transcription factor AP-1                                                                     | 4          | 1.659432134                                                                          | 0.196817003 |
| P54259    | Atrophin-1                                                                                    | 4          | 1.855896859                                                                          | 0.198955126 |
| Q9H0W8    | Protein SMG9                                                                                  | 2          | 2.770152429                                                                          | 0.238132297 |
| Q13371    | Phosducin-like protein                                                                        | 2          | 1.353596924                                                                          | 0.257799919 |
| P23588    | Eukaryotic translation initiation factor 4B                                                   | 6          | 2.991465836                                                                          | 0.259043263 |
| Q14156    | Protein EFR3 homolog A                                                                        | 2          | 1.694267035                                                                          | 0.271922006 |
| P49757    | Protein numb homolog                                                                          | 12         | 2.87602877                                                                           | 0.273134178 |
| Q43303    | Centriolar coiled-coil protein of 110 kDa                                                     | 3          | 1.581254127                                                                          | 0.27888867  |
| Q9UNF1    | Melanoma-associated antigen D2                                                                | 9          | 1.733862072                                                                          | 0.296969196 |
| Q969G3    | SWI/SNF-related matrix-associated actin-dependent regulator of chromatin subfamily E member 1 | 5          | 1.84583864                                                                           | 0.310089533 |

## Supplemental table 2

**Supplemental table 2. Multiplexed mass spectrometry reveals that BirA<sup>R118G</sup>-GFP does not preferentially biotinylate DDR proteins following irradiation.** The biotinylation assay was carried out as described in the methods section followed by MS. Biotinylated proteins with less than two peptides were excluded. The ratio of BirA<sup>R118G</sup>-GFP (Biotin + IR) over BirA<sup>R118G</sup>-RAD18 (Biotin + IR) was calculated and only the biotinylated proteins with a ratio of  $\geq 1.3$  were considered. The p-values were determined for biotinylated proteins and ranked in descending order.
